# Supplementary material for: Integrate Small RNA and Degradome Sequencing to Reveal Drought Memory Response in Wheat (Triticum aestivum L.)
Source: MDPI journal article supplement (doi:10.3390/ijms23115917), 2022-05-25
Supplement: s1 [file s1]

## Support Figures

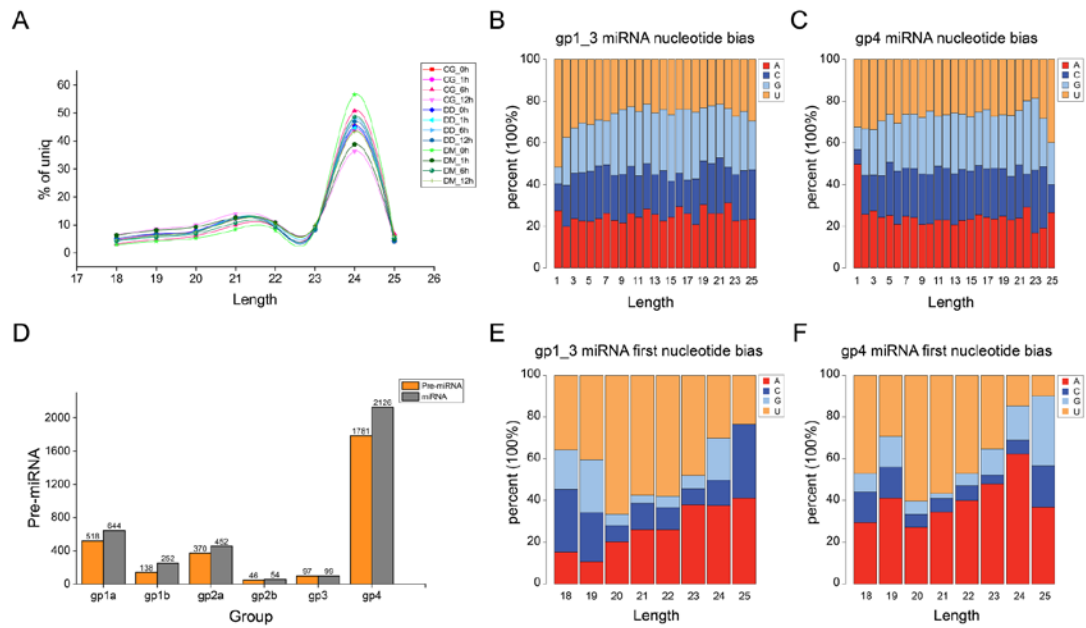

**Figure S1.** The miRNA sequence data overview. **(A)** The length distribution of the unique valid reads in all of the samples. **(B, C)** The base distribution for each position of known, conserved and novel miRNAs. **(D)** Identification of known, conserved and novel miRNAs. Gp1a are known miRNAs; gp1b, gp2a, gp2b and gp3 are conserved miRNAs; and gp4 represents novel miRNAs. **(E, F)** The first nucleotide bias of known, conserved and novel miRNAs.

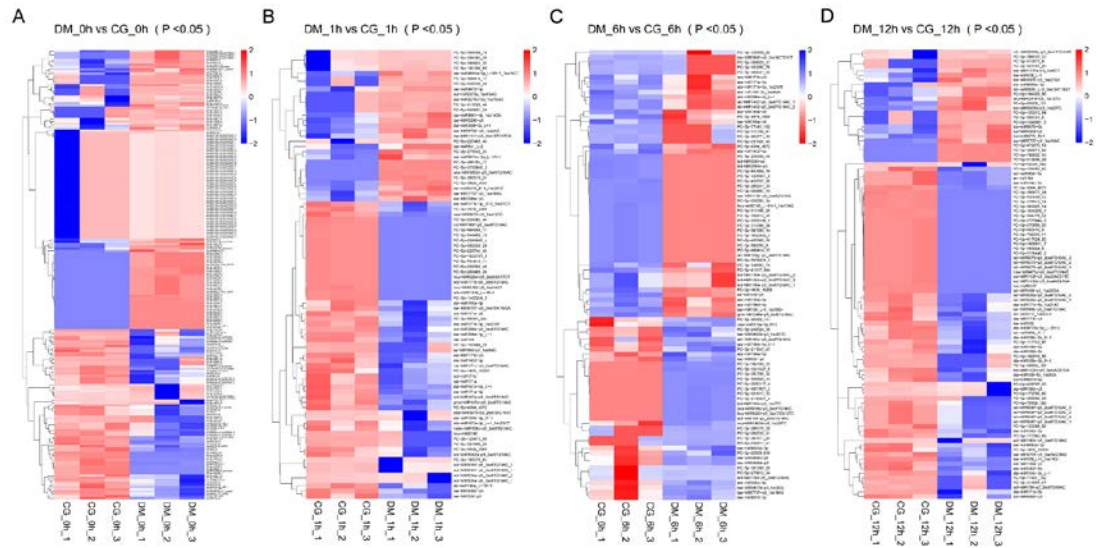

**Figure S2.** Significantly differentially expressed miRNAs between DM and CG groups. (A) The expression patterns of 198 pre-treatment significantly differentially expressed miRNAs (DM\_0 h vs CG\_0 h). (B-D) The expression pattern of 243 significantly ( $p < 0.05$ ) differentially expressed miRNAs in pre-treated wheat seedlings that suffered severe drought. The red, white and blue colors represent the higher to the lower relative abundance of each miRNA.

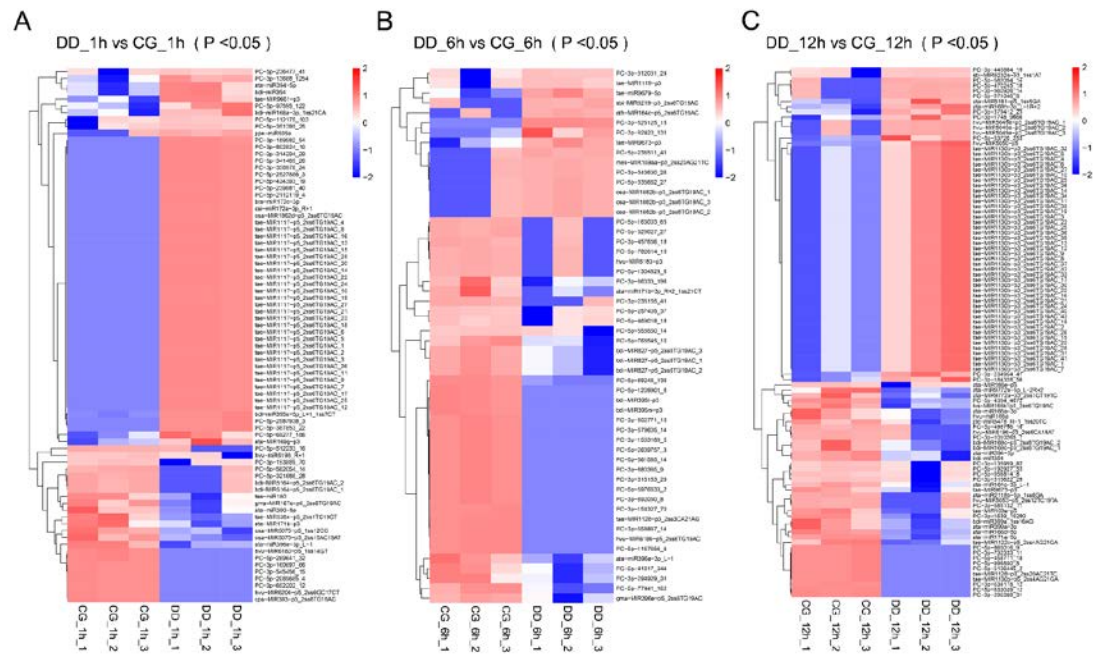

**Figure S3.** The expression patterns of direct drought-related miRNAs. There are 228 significantly differentially expressed miRNAs between DD and CG treatments (union set of DD\_1 h vs. CG\_1 h, DD\_6 h vs. CG\_6 h and DD\_12 h vs. CG\_12 h). The red, white and blue colors represent the higher to the lower relative abundance of each miRNA.
